# Supplementary material for: Evaluation of the Correlation Between Articular Disc Displacement and the Lateral Pterygoid Muscle Using Magnetic Resonance Imaging
Source: Research Square preprint supplement (doi:10.21203/rs.3.rs-6804798/v1), 2025-08-01
Supplement: Supplementary file 1 [file fde35df494d4554155a20a91.xlsx]

## Sheet: Sayfa1
				0: NORMAL	Type 1( S=D)
	1: MALE		1 = R	1:DDwR	Type 2(S=D+C)		S: Superior
	2: FEMALE		2 = L	2:DDwoR	Type 3(I and M=C,S=D		I: Inferior
Case	Gender	Age	Side	Red.	LPM Type		M: Medial
1	1	34	1	0	2		D: Disc
2	1	34	2	0	2		C: Condyle
3	1	28	1	0	1
4	1	28	2	0	2
5	1	43	1	0	1
6	1	43	2	1	3
7	1	59	1	1	2
8	1	59	2	2	2
9	1	73	1	0	2
10	1	73	2	2	2
11	2	21	1	1	2
12	2	21	2	0	2
13	2	62	1	0	3
14	2	62	2	0	2
15	2	46	1	2	3
16	2	46	2	0	1
17	2	28	1	1	2
18	2	28	2	2	2
19	2	18	1	1	2
20	2	18	2	2	2
21	2	25	1	0	2
22	2	25	2	1	2
23	2	38	1	0	2
24	2	38	2	2	3
25	2	23	1	0	2
26	2	23	2	2	1
27	2	59	1	2	1
28	2	59	2	2	1
29	2	25	1	1	2
30	2	25	2	1	3
31	2	30	1	1	2
32	2	30	2	1	2
33	2	32	1	1	3
34	2	32	2	1	2
35	2	29	1	1	3
36	2	29	2	2	2
37	2	25	1	2	2
38	2	25	2	1	2
39	2	27	1	1	1
40	2	27	2	2	1
41	2	22	1	2	1
42	2	22	2	1	2
43	2	24	1	2	2
44	2	24	2	1	2
45	2	17	1	1	1
46	2	17	2	2	2
47	2	34	1	2	1
48	2	34	2	1	2
49	2	50	1	2	3
50	2	50	2	0	3
51	2	24	1	1	2
52	2	24	2	1	2
53	2	25	1	2	1
54	2	25	2	0	1
55	2	25	1	2	3
56	2	25	2	2	1
57	2	46	1	1	2
58	2	46	2	0	1
59	2	57	1	0	1
60	2	57	2	0	2
61	1	25	1	0	2
62	1	25	2	0	1
63	2	28	1	0	2
64	2	28	2	1	2
65	1	37	1	1	2
66	1	37	2	0	3
67	2	14	1	2	2
68	2	14	2	1	2
69	2	51	1	1	1
70	2	51	2	0	1
71	2	57	1	1	2
72	2	57	2	0	1
73	2	21	1	1	2
74	2	21	2	1	2
75	2	21	1	0	2
76	2	21	2	0	3
77	2	37	1	0	2
78	2	37	2	0	1
79	2	17	1	2	2
80	2	17	2	2	2
81	2	52	1	0	2
82	2	52	2	2	2
83	2	29	1	0	1
84	2	29	2	0	2
85	2	48	1	2	1
86	2	48	2	2	2
87	2	67	1	0	2
88	2	67	2	0	3
89	1	19	1	1	2
90	1	19	2	0	2
91	2	18	1	2	2
92	2	18	2	0	1
93	1	21	1	1	1
94	1	21	2	1	1
95	1	36	1	2	3
96	1	36	2	1	2
97	1	29	1	0	1
98	1	29	2	0	1
99	2	21	1	2	2
100	2	21	2	0	2
101	2	33	1	0	3
102	2	33	2	0	2
103	1	39	1	0	2
104	1	39	2	0	2
105	2	25	1	2	2
106	2	25	2	2	2
107	1	28	1	1	2
108	1	28	0	0	1
109	2	53	1	0	2
110	2	53	2	2	2
111	2	35	0	1	2
112	2	35	0	2	2
113	2	46	1	0	2
114	2	46	2	1	2
115	2	16	1	1	2
116	2	16	2	1	2
117	2	19	1	0	2
118	2	19	2	0	2
119	2	56	1	1	1
120	2	56	2	0	2
121	1	64	1	0	1
122	1	64	2	1	1
123	2	16	1	0	2
124	2	16	2	2	1
125	2	18	1	0	1
126	2	18	2	2	2
127	2	56	1	0	2
128	2	56	2	0	2
129	2	24	1	0	2
130	2	24	2	2	2
131	2	24	1	1	2
132	2	24	2	1	1
133	2	42	1	1	2
134	2	42	2	0	2
135	2	17	1	1	1
136	2	17	2	0	1
137	2	26	1	1	2
138	2	26	2	2	2
139	2	24	1	2	2
140	2	24	2	2	2
141	2	22	1	1	2
142	2	22	2	1	2
143	2	34	1	1	2
144	2	34	2	1	2
145	2	25	1	1	1
146	2	25	2	1	3
147	2	32	1	1	2
148	2	32	2	2	2
149	2	45	1	2	2
150	2	45	2	1	3
151	2	39	1	0	2
152	2	39	2	2	2
153	1	19	1	1	2
154	1	19	2	2	2
155	1	20	1	2	1
156	1	20	2	1	2
157	1	24	1	0	1
158	1	24	2	0	1
159	2	31	1	0	3
160	2	31	2	0	1
161	2	38	1	0	3
162	2	38	2	0	3
163	2	35	1	1	2
164	2	35	2	1	1
165	2	17	1	0	2
166	2	17	2	2	2
167	2	64	1	0	3
168	2	64	2	0	2
169	2	20	1	0	2
170	2	20	2	0	2
171	1	70	1	1	2
172	1	70	2	2	1
173	2	20	1	2	2
174	2	20	2	1	2
175	2	24	1	1	1
176	2	24	2	2	2
177	2	26	1	0	2
178	2	26	2	1	3
179	2	21	1	2	1
180	2	21	2	2	2
181	2	40	1	2	2
182	2	40	2	2	2
183	2	21	1	0	1
184	2	21	2	1	1
185	2	30	1	1	2
186	2	30	2	1	2
187	2	23	1	0	1
188	2	23	2	1	1
189	2	18	1	0	2
190	2	18	2	1	2
191	1	39	1	1	2
192	1	39	2	1	1
193	2	41	1	0	2
194	2	41	2	1	2
195	2	30	1	2	2
196	2	30	2	1	1
197	2	19	1	2	2
198	2	19	2	0	2
199	2	18	1	2	2
200	2	18	2	2	2
201	1	25	1	1	2
202	1	25	2	0	1
203	1	22	1	1	2
204	1	22	2	2	1
205	2	35	1	0	1
206	2	35	2	0	2
207	2	54	1	0	3
208	2	54	2	1	2
209	2	18	1	1	1
210	2	18	2	1	2
211	2	29	1	1	2
212	2	29	2	2	2
213	2	32	1	2	2
214	2	32	2	1	2
215	2	19	1	2	2
216	2	19	2	1	2
217	2	15	1	0	1
218	2	15	2	1	2
219	2	16	1	2	1
220	2	16	2	0	1
221	2	47	1	1	2
222	2	47	2	0	3
223	2	29	1	1	2
224	2	29	2	0	1
225	2	32	1	0	2
226	2	32	2	2	2
227	2	18	1	2	1
228	2	18	2	0	2
229	2	16	1	2	2
230	2	16	2	2	2
231	1	22	1	1	1
232	1	22	2	0	3
233	2	48	1	1	2
234	2	48	2	1	2
235	2	25	1	2	2
236	2	25	2	2	1
237	2	33	1	2	2
238	2	33	2	2	2
239	2	55	1	1	2
240	2	55	2	2	2
241	1	48	1	1	2
242	1	48	2	0	2
243	1	39	1	1	2
244	1	39	2	1	1
245	2	31	1	1	2
246	2	31	2	1	2
247	2	42	1	2	1
248	2	42	2	2	1
249	2	57	1	0	1
250	2	57	2	1	3
251	2	29	1	0	2
252	2	29	2	0	1
253	1	40	1	0	2
254	1	40	2	1	2
255	2	55	1	2	1
256	2	55	2	0	1
257	2	45	1	0	1
258	2	45	2	1	2
259	2	22	1	0	2
260	2	22	2	1	2
261	2	48	1	1	1
262	2	48	2	0	1
263	2	60	1	0	2
264	2	60	2	2	2
265	2	45	1	0	1
266	2	45	2	0	2
		Average
TOTAL CASE	F: 216 M: 50	33.188		0:97,1:95,2:74	1:74 2:166 3:26
GENDER	F: 108 M:25
	M: Male
	F: Female
